# Supplementary material for: Genome-Wide SNP discovery and genomic characterization in avocado (Persea americana Mill.)
Source: PubMed Central journal article supplement (PMC6934854; doi:10.1038/s41598-019-56526-4), 2019-12-27
Supplement: 41598_2019_56526_MOESM1_ESM.pdf [file 41598_2019_56526_MOESM1_ESM.pdf]

## Supplementary Information

Genome-Wide SNP discovery and genomic characterization in avocado (*Persea americana* Mill.).

Alicia Talavera<sup>1</sup>, Aboozar Soorni<sup>2</sup>, Aureliano Bombarely<sup>3,4</sup>, Antonio J. Matas<sup>1,5</sup> & Jose Iñaki Hormaza<sup>1</sup> \*

<sup>1</sup>Instituto de Hortofruticultura Subtropical y Mediterránea La Mayora (IHSM-UMA-CSIC), Algarrobo-Costa, Málaga, Spain.

<sup>2</sup>Department of Biotechnology, College of Agriculture, University of Technology, Isfahan 84156-83111, Iran.

<sup>3</sup>School of Plant and Environmental Sciences, Virginia Tech, Blacksburg, VA. USA.

<sup>4</sup>Department of Biosciences Università degli Studi di Milano, Milan, Italy.

<sup>5</sup>Departamento de Biología Vegetal, Universidad de Málaga, Spain.

### Corresponding author

ihormaza@eelm.csic.es

**Supplementary Table S1.** Private SNPs in the 71 avocado cultivars analyzed in this work.

| SampleID | Private SNPs |
|----------|--------------|
| 2835     | 6            |
| A06852   | 1            |
| 871728   | 1            |
| BACO39   | 17           |
| BETA19   | 5            |
| BUTL16   | 5            |
| CABU95   | 41           |
| CATA11   | 6            |
| CHOQ9    | 7            |
| COLL1    | 6            |
| COLI31   | 2            |
| COLL36   | 75           |
| DUSA33   | 21           |
| FUCH17   | 6            |
| G692     | 2            |
| GEM77    | 1            |
| GOTT04   | 41           |
| H28757   | 104          |
| HANS05   | 246          |
| HASS38   | 1            |
| IRIE34   | 8            |
| A06729   | 8            |
| LAHA24   | 1            |
| LAPI93   | 13           |
| LARG24   | 338          |
| LIND50   | 9            |
| LISA23   | 12           |
| MELE12   | 4            |
| MIKE30   | 4            |
| MONR10   | 4            |
| MRTO08   | 28           |
| MUGR27   | 8            |

|        |      |
|--------|------|
| NABA21 | 18   |
| NECR31 | 81   |
| NIML09 | 1    |
| POLL6  | 3    |
| REED89 | 8    |
| RURO36 | 21   |
| RUSS22 | 10   |
| RYAN13 | 11   |
| SEMI14 | 3    |
| TEAG60 | 11   |
| TELE66 | 37   |
| THOM90 | 42   |
| TOCA96 | 64   |
| TRAP2  | 1    |
| TX5344 | 2    |
| VERO4  | 28   |
| WALD28 | 1    |
| WEST5  | 8    |
| YON3   | 2    |
| TOTAL  | 1383 |

**Supplementary Table S2.** Classification of each sample per cluster (K=2-4) performed by DAPC.

| K=3     |        | K=4     |        | K=5     |        |
|---------|--------|---------|--------|---------|--------|
| GROUP 1 | COLI31 | GROUP 1 | YON3   | GROUP 1 | YON3   |
|         | HASS38 |         | CHOQ9  |         | CHOQ9  |
|         | REGA11 |         | MONR10 |         | MONR10 |
|         | MALU85 |         | MELE12 |         | MELE12 |
|         | RINC12 |         | SEMI14 |         | SEMI14 |
|         | RYAN13 |         | FUCH17 |         | FUCH17 |
|         | EDRA63 |         | LISA23 |         | LISA23 |
|         | GWEN40 |         | LARG24 |         | LARG24 |
|         | REED89 |         | COLL36 |         | COLL36 |
|         | FUER16 |         | 114218 |         | RR8691 |
|         | MRTO08 |         | RR8691 |         | G692   |
|         | SHEP42 |         | G692   |         | RURO36 |
|         | 114218 |         | RURO36 |         | COLL1  |
|         | NN1068 |         | ALCA74 |         | TRAP2  |
|         | TX5344 | GROUP 2 | COLI31 | GROUP 2 | WEST5  |
|         | A05720 |         | HASS38 |         | POLL6  |
|         | PINK45 |         | REGA11 |         | CATA11 |
|         | NABA21 |         | MALU85 |         | BUTL16 |
|         | CILF46 |         | RINT12 |         | BERN18 |
|         | LAHA24 |         | RYAN13 |         | BETA19 |
|         | NIML09 |         | EDRA63 |         | RUSS22 |
|         | LYON25 |         | GWEN40 |         | WALD2  |
|         | ALCA74 |         | REED89 |         | MALU85 |
|         | GRAC26 |         | FUER16 |         | REED89 |
|         | LIND50 |         | MRTO08 |         | MRTO08 |
|         | MUGR27 |         | SHEP42 |         | 114218 |

|         |        |         |        |         |        |
|---------|--------|---------|--------|---------|--------|
|         | NN6310 |         | NN1068 |         | NN1068 |
|         | 871728 |         | TX5344 |         | NABA21 |
|         | A06852 |         | A05720 |         | NIML09 |
|         | GEM77  |         | PINK45 |         | ALCA74 |
|         | A06729 |         | NABA21 |         | LIND50 |
|         | MIKE30 |         | CILF46 |         | MUGR27 |
|         | A02554 |         | LAHA24 |         | NN6310 |
|         | H28757 |         | NIML09 |         | A06852 |
|         | HASS55 |         | LYON25 |         | MIKE30 |
|         | IRIE34 |         | GRAC26 |         | COLI31 |
|         | 2835   |         | LIND50 |         | HASS38 |
|         | COLL1  |         | MUGR27 |         | REGA11 |
|         | TRAP2  |         | NN6310 |         | RINT12 |
|         | YON3   |         | 871728 |         | RYAN13 |
|         | WEST5  |         | A06852 |         | EDRA63 |
|         | POLL6  |         | GEM77  |         | GWEN40 |
|         | CHOQ9  |         | A06729 |         | FUER16 |
|         | MONR10 |         | MIKE30 |         | SHEP42 |
|         | CATA11 |         | A02554 |         | TX5344 |
|         | MELE12 |         | H28757 |         | A05720 |
|         | SEMI14 |         | HASS55 | GROUP 4 | PINK45 |
|         | BUTL16 |         | IRIE34 |         | CILF46 |
|         | FUCH17 |         | 2835   |         | LAHA24 |
|         | BERN18 |         | COLL1  |         | LYON25 |
|         | BETA19 |         | TRAP2  |         | GRAC26 |
|         | RUSS22 |         | WEST5  |         | 871728 |
|         | LISA23 |         | POLL6  |         | GEM77  |
|         | LARG24 | GROUP 3 | CATA11 |         | A06729 |
|         | WALD28 |         | BUTL16 |         | A02554 |
|         | COLL36 |         | BERN18 |         | H28757 |
|         | RR8691 |         | BETA19 |         | HASS55 |
| GROUP 2 |        |         |        |         |        |

|         |        |         |        |         |        |
|---------|--------|---------|--------|---------|--------|
|         | G692   |         | RUSS22 |         | IRIE34 |
|         | RURO36 |         | WALD28 |         | 2835   |
| GROUP 3 | VERO4  | GROUP 4 | VERO4  | GROUP 5 | VERO4  |
|         | DUSA33 |         | DUSA33 |         | DUSA33 |
|         | BACO39 |         | BACO39 |         | BACO39 |
|         | TELE66 |         | TELE66 |         | TELE66 |
|         | THOM90 |         | THOM90 |         | THOM90 |
|         | LAPI93 |         | LAPI93 |         | LAPI93 |
|         | CABU95 |         | CABU95 |         | CABU95 |
|         | TOCA96 |         | TOCA96 |         | TOCA96 |
|         | GOTT04 |         | GOTT04 |         | GOTT04 |
|         | NECR31 |         | NECR31 |         | NECR31 |
|         | HANS05 |         | HANS05 |         | HANS05 |
| TEAG60  | TEAG60 | TEAG60  |        |         |        |

**Supplementary Table S3.** Private SNPs segregating in the groups established by DAPC. Percentages are of 7108 private SNPs. The most represented race per group is shown inside the parenthesis.

|            | Groups   | Private SNPs | SNPs % |
|------------|----------|--------------|--------|
| <b>K=3</b> | 1 (GxM)  | 222          | 16.05  |
|            | 2 (WI)   | 519          | 37.52  |
|            | 3 (M)    | 642          | 46.42  |
| <b>K=4</b> | 1 (GxWI) | 474          | 34.27  |
|            | 2 (GxM)  | 222          | 16.05  |
|            | 3 (WI)   | 45           | 3.25   |
|            | 4 (M)    | 642          | 46.42  |
| <b>K=5</b> | 1 (GxWI) | 474          | 34.27  |
|            | 2 (WI)   | 45           | 3.25   |
|            | 3 (G)    | 77           | 5.56   |
|            | 4 (GxM)  | 145          | 10.48  |
|            | 5 (M)    | 642          | 46.42  |

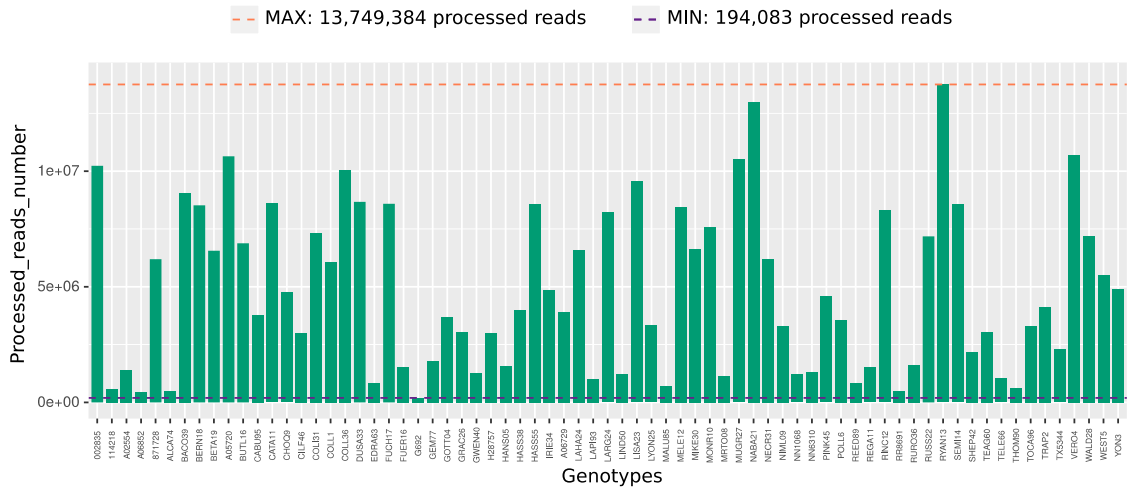

**Figure S1** Processed read number per cultivar. The blue and red lines represent the maximum and minimum number of processed reads, respectively. The barplot was produced using the R software version 3.5.1 with the package ggplot2 version 3<sup>74</sup>.

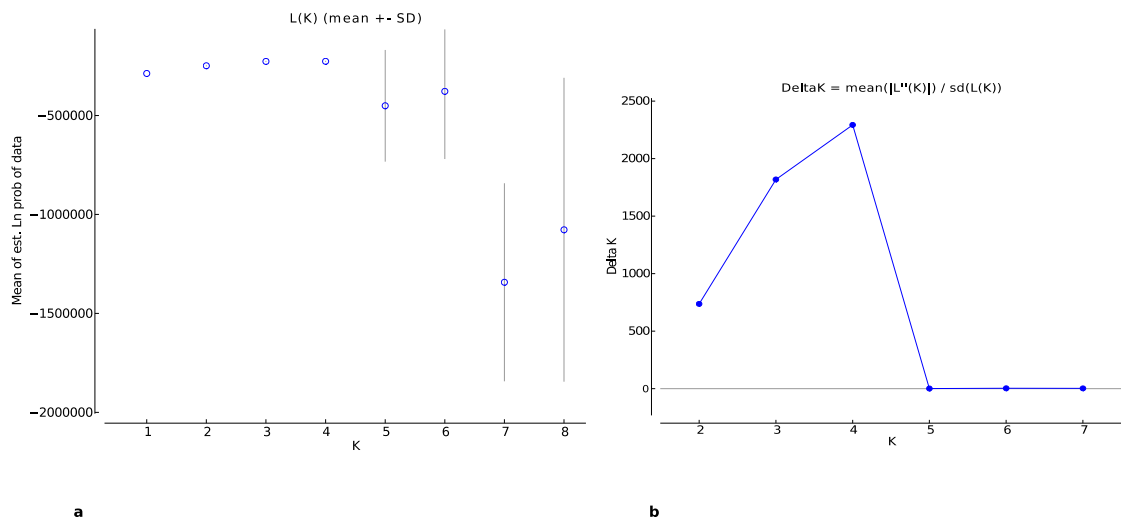

**Figure S2** (a). Data probability for K 1-8. (b). Estimation of the number of groups using the method proposed by Evanno *et al.* (2005). These graphs were produced using STRUCTURE HARVESTER program<sup>40</sup>.

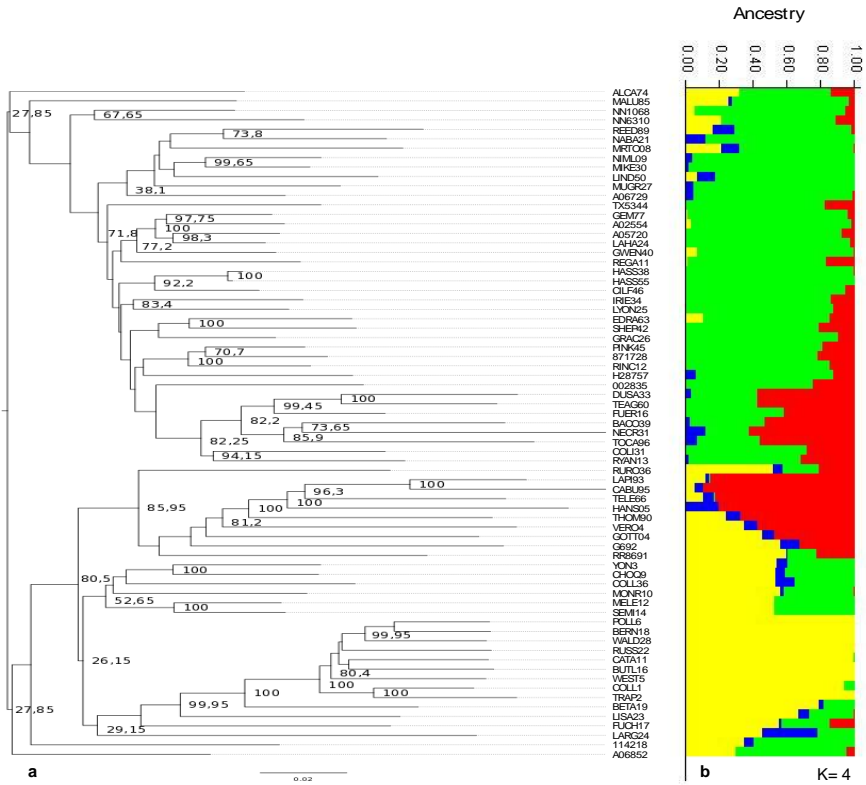

**Figure S3** (a). Dendrogram based on Neighbour Joining (NJ) showing the similarity relationships among 71 avocado accessions. Node labels represent bootstrap values (only values cited in the manuscript and values > 70% are shown) out of 2000 bootstrap replicates. (b). Barplot describing the population stratification of the most informative K values (K=4). Genomic admixture was estimated by STRUCTURE software<sup>39</sup>.
